# Supplementary material for: Magnitude of Tuberculosis, its associated risk factors, Rifampicin resistance, and multi- drug resistance rate among TB presumptive patients at five selected Public Hospitals, Somali Region, Eastern Ethiopia, 2025. Retrospective cross-sectional study
Source: Research Square preprint supplement (doi:10.21203/rs.3.rs-6997913/v1), 2025-08-17
Supplement: Supplementary file 1 [file 6870958d76bf272ab78af439.docx]

**Magnitude of Tuberculosis, its associated risk factors, Rifampicin resistance, and multi-drug resistance rate among TB presumptive patients at five selected Public Hospitals, Somali Region, Eastern Ethiopia, 2025. Retrospective cross-sectional study**

**Annex I: Questionnaires**

**Socio-Demographic, clinical factors and laboratory results**

| **No.** | **Question** | **Response Options** |
| --- | --- | --- |
|  | Age (in years) | ___________ |
|  | Sex | Male ☐ Female ☐ |
|  | Residence | Urban ☐ Rural ☐ |
|  | Reason for diagnosis | presumptive TB ☐ Presumptive DR-TB☐ |
|  | Treatment History of Anti-TB | Previously treated ☐ New case ☐ |
|  | Sites of presumptive TB | Pulmonary ☐, Extra-pulmonary |
|  | TB contact History | Yes ☐, No ☐ |
|  | Types of Specimen | Sputum ☐, pleural fluid☐, Peritoneal fluid, others☐ |
|  | HIV infection | Negative☐, Positive ☐, Unknown ☐ |
|  | Month Tested | _____________ |
|  | Weight (in Kg) | ______________________ |
|  | DM comorbidity | Diabetic ☐, not diabetic ☐ |
|  | Patient registration group | New ☐, Failure ☐, Relapse/default ☐ |
|  | Gene Xpert result | MTB not detected ☐, MTB detected ☐, RR not detected ☐, RR detected ☐ |
|  | XDR Gene-Xpert result | MDR detected ☐, MDR not detected ☐ |
|  |  |  |
|  |  |  |
